# Supplementary material for: Developmental control of CD8+ T cell–avidity maturation in autoimmune diabetes
Source: JCI journal article supplement (doi:10.1172/jci24219), 2005-06-03
Supplement: sd1 [file 1]

# SUPPLEMENTARY FIG. 1

## A

| TCR-BETA                                                        |                 |            |                           | LINE/n       |
|-----------------------------------------------------------------|-----------------|------------|---------------------------|--------------|
| CELLS                                                           | Vb              | Mb         | Jb                        | CELLS        |
| CDR3                                                            |                 |            |                           |              |
| <b>MY8.3</b>                                                    |                 |            |                           | <b>MY8.3</b> |
| Vb8.1                                                           | CAS..SD A       |            | QNTLYFGAGTRLSVL           | Va17.4-Ja42  |
| <b>ISLET-DERIVED CD8+ T-CELLS (DILORENZA ET. AL. - 5 WEEKS)</b> |                 |            |                           |              |
| Vb2.1-Jb1.3                                                     | CTC..S AH R GL  |            | GNTLYFGEGRSLIVV           | Va17.5-Ja42  |
| Vb6.1-Jb1.1                                                     | CAS..S R SGIG   |            | TEVFFGKGTIRLVV            | Va17.6-Ja42  |
| Vb16.1-Jb2.3                                                    | CAS..SL A RP    | S....      | AETLYFGSGTRILTVL          | Va17.6-Ja26  |
| Vb13.1-Jb2.7                                                    | CAS             | S R        | EQYFGPGTRILTVL            | Va17.4-Ja5   |
| Vb8.3-Jb2.7                                                     | CAS..S          | GDR        | Y.....EQYFGPGTRILTVL      | Va17.4-Ja42  |
| Vb11.1-Jb2.7                                                    | CAS..SL GD W GN |            | EQYFGPGTRILTVL            | Va17.4-Ja42  |
| Vb16.1-Jb2.7                                                    | CAS..S SD W G   | Y.....     | EQYFGPGTRILTVL            | Va10-Ja42    |
| Vb8.1-Jb2.7                                                     | CAS..S SD T     | Y.....     | EQYFGPGTRILTVL            | Va8-Ja52     |
| Vb8.1-Jb2.4                                                     | CAS..S          | GTGG       | QNTLYFGAGTRLSVL           | Va4-Ja12     |
| Vb8.1-Jb2.4                                                     | CAS..S          | GTGG       | QNTLYFGAGTRLSVL           | Va20-Ja56    |
| Vb11.1-Jb2.4                                                    | CAS..S          | WTGGG      | TLYFGAGTRLSVL             | Va4-Ja43     |
| Vb13.1-Jb2.4                                                    | CAS             | IKL GG     | QNTLYFGAGTRLSVL           | Va1-Ja53     |
| Vb8.2-Jb1.5                                                     | CAS..GD A       | GGDQ       | APLFGEGTRLSVL             | Va3-Ja37     |
| Vb10.1-Jb2.7                                                    | CAS..S          | L G Q      | Y.....EQYFGPGTRILTVL      | Va18-Ja24    |
| Vb14.1-Jb1.6                                                    | CAW..S          | HSY        | Y.....NSPLYFAAGTRILTVT    | Va4-Ja56     |
| Va5-Ja15                                                        | CAV             | IIY        |                           |              |
| <b>ISLET-DERIVED NRP-A7 TETRAMER+ CD8+ T-CELLS (9 WEEKS)</b>    |                 |            |                           |              |
| Vb16.1-Jb2.7                                                    | CAS..S          | SGTD       | Y.....EQYFGPGTRILTVL      | 7/30         |
| Vb16.1-Jb2.7                                                    | CAS..S          | S GTDC     | EQYFGPGTRILTVL            | 1/30         |
| Vb8.2-Jb2.1                                                     | CAS..G          | PGTGT..Y   | NYAEQFFGPGTRILTVL         | 1/30         |
| Vb7.1-Jb1.2                                                     | CAS..S          | FR GT      | NSDLYFGSGTRILTVL          | 1/30         |
| Vb13.1-Jb2.1                                                    | CAS..S          | FRA GG     | Y.....AEQFFGPGTRILTVL     | 1/30         |
| Vb11.1-Jb2.7                                                    | CAS..SL         | FR DI      | S.....YEQYFGPGTRILTVL     | 1/30         |
| Vb8.1-Jb1.5                                                     | CAS             | GGNNQ      | APLFGEGTRLSVL             | 1/30         |
| Vb8.1-Jb2.7                                                     | CAS..SD AA      | TGGN       | S.....YEQYFGPGTRILTVL     | 1/30         |
| Vb8.1-Jb2.7                                                     | CAS..S          | GDN        | Y.....EQYFGPGTRILTVL      | 1/30         |
| Vb8.1-Jb2.7                                                     | CAS..SD         | DN         | Y.....EQYFGPGTRILTVL      | 1/30         |
| Vb14.1-Jb2.1                                                    | CAW..S          | PGQD       | Y.....AEQFFGPGTRILTVL     | 1/30         |
| Vb8.2-Jb2.7                                                     | CAS..G          | G DS       | S.....YEQYFGPGTRILTVL     | 1/30         |
| Vb14.1-Jb2.1                                                    | CAW..S          | L GLA      | Y.....AEQFFGPGTRILTVL     | 1/30         |
| Vb2.1-Jb2.3                                                     | CTC..S          | A GLGV     | AETLYFGSGTRILTVL          | 1/30         |
| Vb8.1-Jb2.7                                                     | CAS             | KGS        | S.....YEQYFGPGTRILTVL     | 1/30         |
| Vb6.1-Jb2.7                                                     | CAS..S          | MVD W GS   | S.....YEQYFGPGTRILTVL     | 1/30         |
| Vb16.1-Jb2.7                                                    | CAS..SL         | TG         | Y.....EQYFGPGTRILTVL      | 1/30         |
| Vb8.1-Jb2.1                                                     | CAS..S          | GF         | NYAEQFFGPGTRILTVL         | 1/30         |
| Vb2.1-Jb2.1                                                     | CTC..S          | G          | Y.....AEQFFGPGTRILTVL     | 1/30         |
| Vb8.1-Jb2.4                                                     | CAS..SD         | PE         | NTLYFGAGTRLSVL            | 3/30         |
| Vb8.1-Jb2.4                                                     | CAS..SD         |            | S.....QNTLYFGAGTRLSVL     | 1/30         |
| Vb11.1-Jb2.4                                                    | CAS..SL A       |            | QNTLYFGAGTRLSVL           | 1/30         |
| Vb8.1-Jb2.4                                                     | CAS..SD         |            | S.....QNTLYFGAGTRLSVL     | 1/30         |
| <b>ISLET-DERIVED NRP-A7 TETRAMER+ CD8+ T-CELLS (20 WEEKS)</b>   |                 |            |                           |              |
| Vb8.1-Jb2.4                                                     | CAS..SD         |            | S.....QNTLYFGAGTRLSVL     | 1/33         |
| Vb8.1-Jb2.7                                                     | CAS..SD         | DR         | Y.....EQYFGPGTRILTVL      | 1/33         |
| Vb8.1-Jb2.7                                                     | CAS..S          | SGD        | Y.....EQYFGPGTRILTVL      | 1/33         |
| Vb8.1-Jb2.7                                                     | CAS             | KGGS       | Y.....EQYFGPGTRILTVL      | 1/33         |
| Vb8.1-Jb2.7                                                     | CAS             | TA GD      | Y.....EQYFGPGTRILTVL      | 1/33         |
| Vb8.1-Jb2.7                                                     | CAS             | KGS        | SY.....EQYFGPGTRILTVL     | 1/33         |
| Vb8.3-Jb2.7                                                     | CAS..S          | GDR        | Y.....EQYFGPGTRILTVL      | 1/33         |
| Vb16.1-Jb2.4                                                    | CAS..SL         | YGGSR      | QNTLYFGAGTRLSVL           | 1/33         |
| Vb16.1-Jb2.2                                                    | CAS..S          | LA         | NTGQLYFGEGSKLTVL          | 1/33         |
| Vb16.1-Jb1.4                                                    | CAS..SL         | TGKAP      | NERLFFGHGTRLSVL           | 1/33         |
| Vb16.1-Jb2.3                                                    | CASS            | VFGQP      | ETLYFGSGTRILTVL           | 1/33         |
| Vb2.1-Jb2.4                                                     | CTC..S          | A HRGRG    | NTLYFGAGTRLSVL            | 1/33         |
| Vb2.1-Jb2.7                                                     | CTC..S          | A GGR      | EQYFGPGTRILTVL            | 1/33         |
| Vb11.1-Jb2.4                                                    | CAS..S          | PR TGG     | S.....QNTLYFGAGTRLSVL     | 1/33         |
| Vb11.1-Jb2.7                                                    | CAS..SL         | GTGGG      | Y.....EQYFGPGTRILTVL      | 1/33         |
| Vb8.1-Jb2.7                                                     | CAS             | EGG        | Y.....EQYFGPGTRILTVL      | 1/33         |
| Vb8.1-Jb2.7                                                     | CAS             | TA GD      | Y.....EQYFGPGTRILTVL      | 2/33         |
| Vb8.2-Jb2.7                                                     | CAS..G          | EP GT E    | Y.....EQYFGPGTRILTVL      | 1/33         |
| Vb8.1-Jb2.7                                                     | CAS..SD         | EQ         | Y.....EQYFGPGTRILTVL      | 2/33         |
| Vb8.1-Jb2.7                                                     | CAS             | TA RD      | Y.....EQYFGPGTRILTVL      | 1/33         |
| Vb8.1-Jb2.7                                                     | CAS             | KGG        | SY.....EQYFGPGTRILTVL     | 1/33         |
| Vb8.1-Jb2.7                                                     | CAS..S          | GGQ        | Y.....EQYFGPGTRILTVL      | 1/33         |
| Vb8.3-Jb2.4                                                     | CAS..SD         | LDF        | Y.....EQYFGPGTRILTVL      | 1/33         |
| Vb13.1-Jb1.2                                                    | CAS             | S RD       | SA NSDLYFGSGTRILTVL       | 2/33         |
| Vb11.1-Jb2.7                                                    | CAS..S          | RGLVV      | SY.....EQYFGPGTRILTVL     | 1/33         |
| Vb11.2-Jb2.5                                                    | CAS..S          | FHHRG      | S.....QDTQYFGPGTRILTVL    | 1/33         |
| Vb12.1-Jb2.5                                                    | CAS..SL         | D W GV     | QDTQYFGPGTRILTVL          | 1/33         |
| Vb10.1-Jb2.7                                                    | CAS..S          | TD W       | SY.....EQYFGPGTRILTVL     | 1/33         |
| Vb11.1-Jb2.7                                                    | CAS..S          | D W G      | SY.....EQYFGPGTRILTVL     | 1/33         |
| Vb11.1-Jb2.7                                                    | CAS..S          | WGD W G    | Y.....EQYFGPGTRILTVL      | 1/33         |
| Vb11.1-Jb2.4                                                    | CAS..SL         | DY W G     | S QNTLYFGAGTRLSVL         | 1/33         |
| <b>ISLET-DERIVED NRP-A7 TETRAMER- CD8+ T-CELLS (9 WEEKS)</b>    |                 |            |                           |              |
| Vb11.1-Jb2.7                                                    | CAS..SL         | GP         | QGVV Y.....EQYFGPGTRILTVL | 2/33         |
| Vb6.1-Jb1.4                                                     | CAS..S          | R GGGI     | S.....NERLFFGHGTRLSVL     | 1/33         |
| Vb8.1-Jb2.4                                                     | CAS..S          | EGQGI      | QNTLYFGAGTRLSVL           | 1/33         |
| Vb14.1-Jb2.1                                                    | CAW..S          | PGQD       | Y.....AEQFFGPGTRILTVL     | 1/33         |
| Vb2.1-Jb2.7                                                     | CTC..S          | AID W GG   | Y.....EQYFGPGTRILTVL      | 2/33         |
| Vb6.1-Jb2.7                                                     | CAS..S          | MVD W GS   | S.....EQYFGPGTRILTVL      | 1/33         |
| Vb12.1-Jb2.7                                                    | CAS..S          | FW GS      | S.....YEQYFGPGTRILTVL     | 1/33         |
| Vb14.1-Jb1.5                                                    | CAW             | TGGQ       | APLFGEGTRLSVL             | 1/33         |
| Vb11.1-Jb2.7                                                    | CAS..SL         | VPGL GGR   | EQYFGPGTRILTVL            | 1/33         |
| Vb11.1-Jb2.7                                                    | CAS..S          | PRL GGW    | EQYFGPGTRILTVL            | 1/33         |
| Vb8.2-Jb2.5                                                     | CAS..G          | LR GG F    | NDQTYFGPGTRILTVL          | 1/33         |
| Vb13.1-Jb2.2                                                    | CAS..S          | PRL GG     | NSDLYFGSGTRILTVL          | 1/33         |
| Vb14.1-Jb1.6                                                    | CAW             | R TGG      | Y.....NSPLYFAAGTRILTVT    | 1/33         |
| Vb9.1-Jb2.2                                                     | CAS             | RRL G D    | TGQLYFGEGSKLTVL           | 1/33         |
| Vb16.1-Jb1.3                                                    | CAS..S          | FD RLSG D  | TLYFGKGSRLIVV             | 1/33         |
| Vb8.3-Jb2.3                                                     | CAS..S          | VS LGGRF   | AETLYFGSGTRILTVL          | 1/33         |
| Vb16.1-Jb1.2                                                    | CAS..SL         | D R GL     | S.....DLYFGSGTRILTVL      | 1/33         |
| Vb8.1-Jb1.3                                                     | CAS..S          | YR G       | S.....GNTLYFGEGSRILVIV    | 1/33         |
| Vb6.1-Jb1.1                                                     | CAS..S          | R SG       | TEVFFGKGTIRLVV            | 1/33         |
| Vb2.1-Jb2.1                                                     | CTC..S          | G          | Y.....AEQFFGPGTRILTVL     | 1/33         |
| Vb11.1-Jb2.5                                                    | CAS..SL         | E GG       | QDTQYFGPGTRILTVL          | 1/33         |
| Vb6.1-Jb1.4                                                     | CAS..S          | MSGF       | S.....NERLFFGHGTRLSVL     | 1/33         |
| Vb2.1-Jb2.3                                                     | CTC..S          | AGL GV     | AETLYFGSGTRILTVL          | 1/33         |
| Vb16.1-Jb2.7                                                    | CAS..S          | SGTD       | Y.....EQYFGPGTRILTVL      | 1/33         |
| Vb16.1-Jb2.7                                                    | CAS..S          | GTD        | Y.....EQYFGPGTRILTVL      | 1/33         |
| Vb8.1-Jb2.7                                                     | CAS             | GRDI       | S.....YEQYFGPGTRILTVL     | 1/33         |
| Vb11.1-Jb2.5                                                    | CAS..S          | TGLAPT     | TQYFGPGTRILTVL            | 1/33         |
| Vb14.1-Jb2.7                                                    | CAW..S          | PYRS       | S.....YEQYFGPGTRILTVL     | 1/33         |
| Vb13.1-Jb2.3                                                    | CAS..S          | FRI        | S.....AETLYFGSGTRILTVL    | 1/33         |
| Vb16.1-Jb2.7                                                    | CAS..S          | F I        | S.....YEQYFGPGTRILTVL     | 1/33         |
| Vb2.1-Jb1.6                                                     | CTC..S          | ADL        | NSPLYFGFAAGTRILTVT        | 1/33         |
| <b>ISLET-DERIVED NRP-A7 TETRAMER- CD8+ T-CELLS (20 WEEKS)</b>   |                 |            |                           |              |
| Vb12.1-Jb2.5                                                    | CAS..SL         | D W GV     | QDTQYFGPGTRILTVL          | 6/38         |
| Vb16.1-Jb2.5                                                    | CAS..S          | SD W G     | QDTQYFGPGTRILTVL          | 1/38         |
| Vb10.1-Jb2.7                                                    | CAS..S          | T D W      | S.....YEQYFGPGTRILTVL     | 1/38         |
| Vb10.1-Jb2.7                                                    | CAS..S          | YD YW      | Y.....EQYFGPGTRILTVL      | 1/38         |
| Vb12.1-Jb2.2                                                    | CAS..S          | W G....Y   | TGQLYFGEGSKLTVL           | 1/38         |
| Vb16.1-Jb2.5                                                    | CAS..SL         | D W V      | QDTQYFGPGTRILTVL          | 1/38         |
| Vb12.1-Jb2.4                                                    | CAS..S          | WNGV       | NTLYFGAGTRLSVL            | 1/38         |
| Vb8.2-Jb2.1                                                     | CAS..GD         | LRW GG A   | Y.....AEQFFGPGTRILTVL     | 1/38         |
| Vb10.1-Jb2.7                                                    | CAS..S          | YAPG L GGR | EQYFGPGTRILTVL            | 1/38         |
| Vb8.3-Jb2.1                                                     | CAS..S          | GGLANY.... | AEQFFGPGTRILTVL           | 1/38         |
| Vb14.1-Jb2.4                                                    | CAW..S          | LG L GGR   | QNTLYFGAGTRLSVL           | 1/38         |
| Vb8.3-Jb2.1                                                     | CAS..S          | GGLANY.... | AEQFFGPGTRILTVL           | 1/38         |
| Vb8.3-Jb2.2                                                     | CAS..S          | R G        | NTGQLYFGEGSKLTVL          | 1/38         |
| Vb8.3-Jb2.1                                                     | CAS..SD         | A R G      | NY.....AEQFFGPGTRILTVL    | 1/38         |
| Vb8.3-Jb2.4                                                     | CAS..S          | GR G       | QNTLYFGAGTRLSVL           | 1/38         |
| Vb8.1-Jb2.4                                                     | CAS..S          | GR G       | QNTLYFGAGTRLSVL           | 1/38         |
| Vb2.1-Jb2.4                                                     | CTC..S          | AH R G RG  | NTLYFGAGTRLSVL            | 1/38         |
| Vb6.1-Jb2.7                                                     | CAS..S          | PQ G       | Y.....EQYFGPGTRILTVL      | 1/38         |
| Vb12.1-Jb2.2                                                    | CAS..S          | L GF       | QDTQYFGPGTRILTVL          | 2/38         |
| Vb2.1-Jb2.4                                                     | CTC..S          | AAG A G    | QNTLYFGAGTRLSVL           | 1/38         |
| Vb16.1-Jb1.4                                                    | CAS..SL         | TGKAP      | NERLFFGHGTRLSVL           | 1/38         |
| Vb12.1-Jb1.1                                                    | CAS..X          | X GL       | NTEVFFGKGTIRLVV           | 1/38         |
| Vb11.1-Jb2.2                                                    | CAS..S          | R D SA     | NSDLYFGSGTRILTVL          | 1/38         |
| Vb13.1-Jb2.2                                                    | CAS..S          | R D SA     | NSDLYFGSGTRILTVL          | 1/38         |
| Vb3.1-Jb1.1                                                     | CAS             | R DR       | EVFFGKGTIRLVV             | 1/38         |
| Vb8.3-Jb1.6                                                     | CAS..SD         | R R        | NSPLYFAAGTRILTVT          | 2/38         |
| Vb11.1-Jb2.5                                                    | CAS..SL         | E RA       | NDQTYFGPGTRILTVL          | 1/38         |
| Vb16.1-Jb2.7                                                    | CAS..SL         | ET A       | Y.....EQYFGPGTRILTVL      | 2/38         |
| Vb8.1-Jb2.4                                                     | CAS..SD         | D PT       | S.....QNTLYFGAGTRLSVL     | 1/38         |
| Vb6.1-Jb2.1                                                     | CAS..S          | EK         | FGPGTRILTVL               | 1/38         |

## B

| TCR-ALPHA                                                       |               |         |                            | LINE/n       |
|-----------------------------------------------------------------|---------------|---------|----------------------------|--------------|
| CELLS                                                           | Va            | Ma      | Ja                         | CELLS        |
| CDR3                                                            |               |         |                            |              |
| <b>MY8.3</b>                                                    |               |         |                            | <b>MY8.3</b> |
| Va17.4-Ja42                                                     | CA...M.R D    |         | S....GGSNAKLTFGKGTKLSVK SN | MY8          |
| <b>ISLET-DERIVED CD8+ T-CELLS (DILORENZA ET. AL. - 5 WEEKS)</b> |               |         |                            |              |
| Va17.5-Ja42                                                     | CA...M.R D    |         | S....GGSNAKLTFGKGTKLSVK S  | AI12.B1.3    |
| Va17.6-Ja42                                                     | CA...M.R EG   |         | GGSNAKLTFGKGTKLSVK S       | AI15.A3      |
| Va17.6-Ja26                                                     | CA...M.R EGG  |         | NYAQGLT? FG??? ??????      | AI11.A7      |
| Va17.4-Ja5                                                      | CA...M.R EAGT |         | QVVQGLT FGRGTQLQVYA        | AI15.F5      |
| Va17.4-Ja42                                                     | CA...M.R V    | S....   | GGSNAKLTFGKGTKLSVK S       | AI11.A5      |
| Va17.4-Ja42                                                     | CA...M.R V    | S....   | GGSNAKLTFGKGTKLSVK S       | AI11.B2      |
| Va10-Ja42                                                       | CA...MER V    |         | GGSNAKLTFGKGTKLSVK S       |              |
| Va8-Ja52                                                        | CA...L RTAG   |         | ANTGKLTFGGTILRVHP          |              |
| Va4-Ja12                                                        | CA...L SG     |         | TGGYKVV FGSSTRLLVSP        |              |
| Va20-Ja56                                                       | CAA M A       |         | TGGNNKLTFGGTIVLSV P        |              |
| Va4-Ja43                                                        | CAAS A W      |         | NNNAPRFAGATKLSV P          |              |
| Va1-Ja53                                                        | CAVS A.....S  |         | GGSNYKLTFGKGTLLVTP         |              |
| Va3-Ja37                                                        | CAVS A A      |         | GNTKRLI? FG??? ??????      |              |
| Va18-Ja24                                                       | CAT E TT      |         | AS LGKLG FGTGTQVVVTP       |              |
| Va4-Ja56                                                        | CAL T         |         | TGGNNKLTFGGTIVLSV P        |              |
| Va5-Ja15                                                        | CAV IIV       |         | QGGRALI FGTGTIVSVS P       |              |
| <b>ISLET-DERIVED NRP-A7 TETRAMER+ CD8+ T-CELLS (9 WEEK)</b>     |               |         |                            |              |
| Va17.4-Ja42                                                     | CA...M.R D    | S....   | GGSNAKLTFGKGTKLSVK S       | 13/47        |
| Va17.5-Ja42                                                     | CA...M.R D    | S....   | GGSNAKLTFGKGTKLSVK S       | 6/47         |
| Va17.5-Ja42                                                     | CA...M.R V    | S....   | GGSNAKLTFGKGTKLSVK S       | 1/47         |
| Va17.4/5-Ja42                                                   | CA...M.R D    | S....   | GGSNAKLTFGKGTKLSVK S       | 11/47        |
| Va17.6-Ja42                                                     | CA...M.R D    | S....   | GGSNAKLTFGKGTKLSVK S       | 8/47         |
| Va17.5-Ja45                                                     | CA...M.R D    |         | TGGADRILTFGKGTQLLIQ P      | 1/47         |
| Va17.4-Ja53                                                     | CA...M SN     | S....   | GGSNYKLTFGKGTLLVTP         | 2/47         |
| Va17.5-Ja53                                                     | CA...M SN     | S....   | GGSNYKLTFGKGTLLVTP         | 1/47         |
| Va5.2-Ja31                                                      | CAV           | SN      | NNRIF FGDGTQLVVP           | 2/47         |
| Va3.5-Ja30                                                      | CA G          | D.....  | TNAYKVI FGTGTHLHVLP        | 1/47         |
| Va4.9-Ja30                                                      | CAL L         | D.....  | TNAYKVI FGTGTHLHVLP        | 1/47         |
| <b>ISLET-DERIVED NRP-A7 TETRAMER- CD8+ T-CELLS (20 WEEKS)</b>   |               |         |                            |              |
| Va17.4-Ja42                                                     | CA...M.R D    | S....   | GGSNAKLTFGKGTKLSVK S       | 17/65        |
| Va17.5-Ja42                                                     | CA...M.R D    | S....   | GGSNAKLTFGKGTKLSVK S       | 18/65        |
| Va17.5-Ja42                                                     | CA...M.R N    | S....   | GGSNAKLTFGKGTKLSVK S       | 3/65         |
| Va17.5-Ja53                                                     | CA...M SN     | S....   | GGSNYKLTFGKGTLLVTP         | 2/65         |
| Va17.4/5-Ja42                                                   | CA...M.R D    | S....   | GGSNAKLTFGKGTKLSVK S       | 9/65         |
| Va17.4/5-Ja21                                                   | CA...M.R E G  | MP..... | NYNVLY FGSSTKLIVE P        | 1/65         |
| Va17.4/5-Ja53                                                   | CA...M SN     | S....   | GGSNYKLTFGKGTLLVTP         | 1/65         |
| Va4.9-Ja18                                                      | CALS DR       |         | GSALGRHFGAGTQLLIV P        | 1/65         |
| Va3.x-Ja23                                                      | CAVS AV       | Y.....  | NQKGLI FGTGTKLSIK P        | 1/65         |
| Va8.x-Ja42                                                      | CAL RLR       | S....   | GGSNAKLTFGKGTKLSVK S       | 1/65         |
| Va10-Ja43                                                       | CA...M A      |         | NNNAPRFAGATKLSV P          | 1/65         |
| Va5.2-Ja48                                                      | CAV SA        | G....   | YGNKIT FGTGTKLSIK P        | 2/65         |
| Va8-Ja41                                                        | CAL KGN       |         | NNAGAKLTFGGTTRILV P        | 1/65         |
| Va1.3-Ja22                                                      | CAVS S        | SG..... | SWQLI FGSSTQLVMP           | 1/65         |
| Va11-Ja40                                                       | CAA ERA       | G.....  | NYKYV FGTGTQLVVP           | 3/65         |
| Va10.5-Ja37                                                     | CA...MERA     | G....   | NTRKLI FGLTTLQVQ P         | 1/65         |
| Va3.1-Ja52                                                      | CA...V.R SN   | T G.... | ANTGKLT FGHGTILRVHP        | 1/65         |
| Va8.x-Ja31                                                      | CAL CN        |         | NNRIF FGDGTQLVVP           | 1/65         |
| <b>ISLET-DERIVED NRP-A7 TETRAMER- CD8+ T-CELLS (9 WEEKS)</b>    |               |         |                            |              |
| V                                                               |               |         |                            |              |

Supplementary Figure 1. TCR repertoire of islet-derived, NRP-A7-reactive CD8<sup>+</sup> T cells in 9- vs. 20-week-old NOD mice. A, CD8<sup>+</sup> cells, isolated from islets of 15-20 mice/age group (9- or 20-wk-old NOD mice) were stained with NRP-A7 tetramers and anti-CD8 mAb, sorted by flow cytometry into tetramer<sup>+</sup> and tetramer<sup>-</sup> CD8<sup>+</sup> cells, and used as a source of RNA to generate TCR-specific cDNA libraries by anchor-PCR. Figure shows the different VJ $\alpha$  and VDJ $\beta$  rearrangements and junctional sequences that were obtained and the number of copies of each rearrangement/the total number of informative recombinants that were sequenced. The sequences are compared to the 8.3 TCR rearrangements (top), and to the rearrangements expressed by CD8<sup>+</sup> lines and clones propagated from islets of ~5-wk-old NOD mice (second panel from the top (26)). B, TCR $\alpha$  sequences expressed by splenic CD8<sup>+</sup> cells from acutely diabetic NOD mice and V $\alpha$ 17<sup>+</sup> TCR $\alpha$  sequences expressed by splenic CD8<sup>+</sup> cells of pre-diabetic NOD mice.
